# Supplementary material
Source: Springer Nature journal article supplement (https://www.springermedizin.de/resource/supplementary/12958_2005_298_MOESM2_ESM.pdf/9567574)

# Nuclear Hormone Receptor Structure

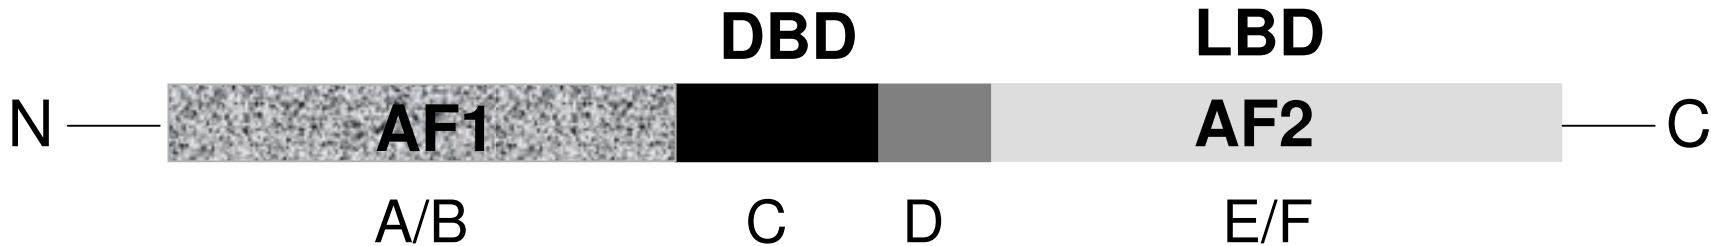

Supplement: MOESM2 [file 9567574]
